# Supplementary material for: A Deep Learning-Based Pipeline for Segmenting the Cerebral Cortex Laminar Structure in Histology Images
Source: Research Square preprint supplement (doi:10.21203/rs.3.rs-4647115/v1), 2024-07-19
Supplement: Supplementary file 1 [file cab761514a540d9135f13f8c.pdf]

# Supplementary Information

## 1 The Core Image Segmentation Model

After the image patches have been made by the Patch Maker module, they are then passed to an image segmentation model, called nnU-Net (Isensee et al., 2021). nnU-Net is an image segmentation framework developed for medical image processing; the core of the segmentation model is U-Net with some modifications. For example, the z-score normalization (Ulyanov et al., 2016), leaky ReLU activation function (Ulyanov et al., 2016) and deep supervision module (Li et al., 2022) were replaced or added to the original U-Net deep learning model. The final layer contains one convolution layer with a kernel size of  $1 \times 1$  and seven feature maps, six feature maps per layer, and one feature map for the background. These feature maps then pass through a softmax activation function (Sharma et al., 2017) to produce the final multi-class segmentation mask image.

nnU-Net has a built-in module for cropping the large image to small patches, however, since, we developed our own Patch Maker module, the built-in module was disabled by simply changing the patch\_size in the “nnUNetPlans.json” file to  $512 \times 512$  before executing the “nnUNetv2\_preprocess” command, moreover, the batch\_size value was also changed to 32 instead the lower number generated by nnU-Net.

## 2 Model Training Details

The model is trained using the sum of the cross-entropy loss ( $L_{CE}$ ) (Zhang & Sabuncu, 2018) and Dice loss ( $L_{Dice}$ ) (Drozdal et al., 2016; Jadon, 2020). The lowest loss values for  $L_{CE}$  and  $L_{Dice}$  are -1 and 0, respectively. We expect the total loss  $L_{total}$  to decrease from positive infinity to as close as possible to -1 during the training phase. For the optimiser, the stochastic gradient descent with Nesterov momentum ( $\mu = 0.99$ ) optimiser (Dozat, 2016) is used. The learning rate has changed to 0.005 (0.01 as the default value), and a new nnU-Net trainer was created based on the existing source code, and altered the maximum training epoch to 100.

Three brains were used as our image dataset for training, validation, and testing. The original nnU-Net train-val splitting module was overwritten by our own source code so that custom data splitting could be performed. Since the file name of each patch image has a brain ID associated with it, our Python source code reads the patch image file name and extracts the brain ID, then splits the training, validation, and

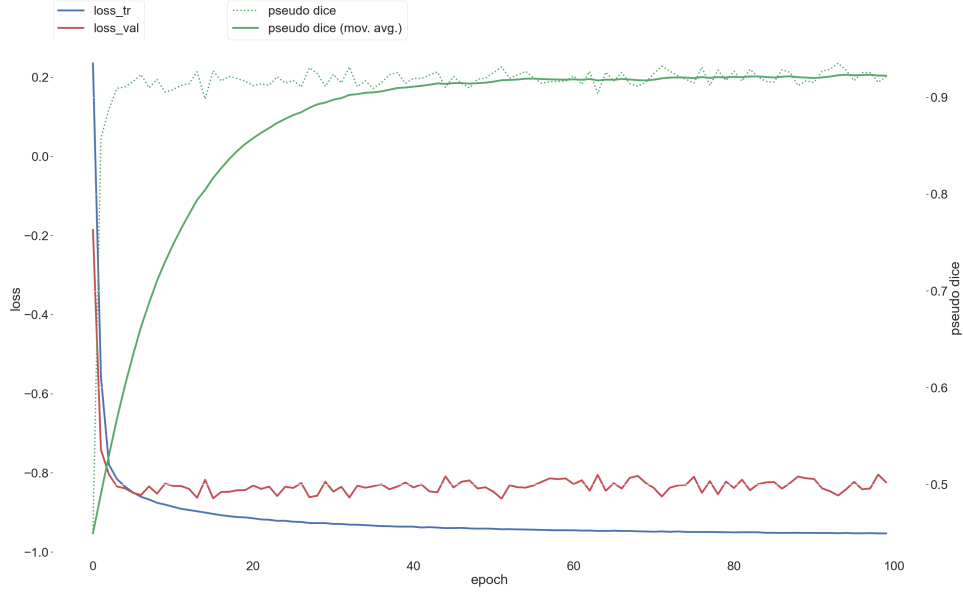

**Fig. 1:** Train-val Loss Plot

testing set based on that, so that 3-fold cross-validation can be performed. The minimum training loss and validation loss observed were -0.953 and -0.864, respectively. Fig. 1 shows the training and validation loss plot for one of the folds.

## References

- Dozat, T. (2016). Incorporating nesterov momentum into adam.
- Drozdzal, M., Vorontsov, E., Chartrand, G., Kadoury, S., & Pal, C. (2016). The importance of skip connections in biomedical image segmentation. In G. Carneiro, D. Mateus, L. Peter, A. Bradley, J. M. R. S. Tavares, V. Belagiannis, J. P. Papa, J. C. Nascimento, M. Loog, Z. Lu, J. S. Cardoso, & J. Cornebise (Eds.), *The proceeding of the deep learning and data labeling for medical applications* (pp. 179–187). Springer International Publishing.
- Isensee, F., Jaeger, P. F., Kohl, S. A. A., Petersen, J., & Maier-Hein, K. H. (2021). Nnu-net: A self-configuring method for deep learning-based biomedical image segmentation. *Nature Methods*, 18(2), 203–211.
- Jadon, S. (2020). A survey of loss functions for semantic segmentation. *2020 IEEE conference on computational intelligence in bioinformatics and computational biology (CIBCB)*, 1–7.
- Li, R., Wang, X., Huang, G., Yang, W., Zhang, K., Gu, X., Tran, S. N., Garg, S., Alty, J., & Bai, Q. (2022). A comprehensive review on deep supervision: Theories and applications. *arXiv preprint arXiv:2207.02376*.
- Sharma, S., Sharma, S., & Athaiya, A. (2017). Activation functions in neural networks. *Towards Data Sci*, 6(12), 310–316.

- Ulyanov, D., Vedaldi, A., & Lempitsky, V. (2016). Instance normalization: The missing ingredient for fast stylization. *arXiv preprint arXiv:1607.08022*.
- Zhang, Z., & Sabuncu, M. (2018). Generalized cross entropy loss for training deep neural networks with noisy labels. *Advances in neural information processing systems*, 31.
